# Supplementary material for: Correction: Correction: Auranofin Inhibits Retinal Pigment Epithelium Cell Survival through Reactive Oxygen Species-Dependent Epidermal Growth Factor Receptor/ Mitogen-Activated Protein Kinase Signaling Pathway
Source: PubMed Central journal article supplement (PMC5659781; doi:10.1371/journal.pone.0187417), 2017-10-27
Supplement: pone.0187417.s001.pdf [file pone.0187417.s001.pdf]

CORRECTION

# Correction: Auranofin Inhibits Retinal Pigment Epithelium Cell Survival through Reactive Oxygen Species-Dependent Epidermal Growth Factor Receptor/ Mitogen-Activated Protein Kinase Signaling Pathway

Xiaodong Chen, Radouil Tzekov, Mingyang Su, Haiyan Hong, Wang Min, Aidong Han, Wensheng Li

There are a number of errors in Table 1. The “Application” value for “P38MAPK” in line 4 should read “WB”. The “Dilution” value for “MAPKAPK2” in line 13 should read “1:1000 (WB)”. The “Dilution” value for “HSP27” in line 15 should read “1:1000”. Please view the correct [Table 1](#) here.

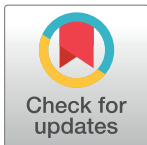

## OPEN ACCESS

**Citation:** Chen X, Tzekov R, Su M, Hong H, Min W, Han A, et al. (2017) Correction: Auranofin Inhibits Retinal Pigment Epithelium Cell Survival through Reactive Oxygen Species-Dependent Epidermal Growth Factor Receptor/ Mitogen-Activated Protein Kinase Signaling Pathway. PLoS ONE 12(2): e0172599. doi:10.1371/journal.pone.0172599

**Published:** February 21, 2017

**Copyright:** © 2017 Chen et al. This is an open access article distributed under the terms of the [Creative Commons Attribution License](#), which permits unrestricted use, distribution, and reproduction in any medium, provided the original author and source are credited.

**Table 1. Primary antibodies used for immunodetection.**

| Name      | Species | Manufacturer   | Product number | Application | Dilution             |
|-----------|---------|----------------|----------------|-------------|----------------------|
| pEGFR     | Rabbit  | Cell Signaling | 3777           | WB, IF      | 1:1000(WB),1:100(IF) |
| EGFR      | Rabbit  | Cell Signaling | 4267           | WB, IF      | 1:1000(WB),1:100(IF) |
| pP38MAPK  | Rabbit  | Cell Signaling | 4511           | WB, IF      | 1:1000(WB),1:100(IF) |
| P38MAPK   | Rabbit  | Cell Signaling | 9212           | WB          | 1:1000               |
| pJNK      | Rabbit  | Cell Signaling | 4668           | WB          | 1:1000               |
| pJNK      | Mouse   | Cell Signaling | 9255           | IF          | 1:100                |
| JNK       | Rabbit  | Cell Signaling | 9252           | WB          | 1:1000               |
| pERK      | Rabbit  | Cell Signaling | 4370           | WB, IF      | 1:1000(WB),1:100(IF) |
| ERK       | Rabbit  | Cell Signaling | 9102           | WB          | 1:1000               |
| p-c-Jun   | Rabbit  | Cell Signaling | 3270           | WB, IF      | 1:1000(WB),1:100(IF) |
| c-Jun     | Rabbit  | Cell Signaling | 9165           | WB          | 1:1000               |
| pMAPKAPK2 | Rabbit  | Cell Signaling | 3007           | WB, IF      | 1:1000(WB),1:100(IF) |
| MAPKAPK2  | Rabbit  | Cell Signaling | 3042           | WB          | 1:1000               |
| pHSP27    | Rabbit  | Cell Signaling | 9709           | WB, IF      | 1:1000(WB),1:100(IF) |
| HSP27     | Mouse   | Cell Signaling | 2402           | WB          | 1:1000               |
| BrdU      | Mouse   | Proteintech    | 66241          | IF          | 1:500                |

WB, Western blot; IF, immunofluorescence.

doi:10.1371/journal.pone.0172599.t001

In Fig 5, Fig 5C shows the incorrect image under the “AF 1.0  $\mu$ M” header for “0h”. Please view the correct [Fig 5](#) here.

A

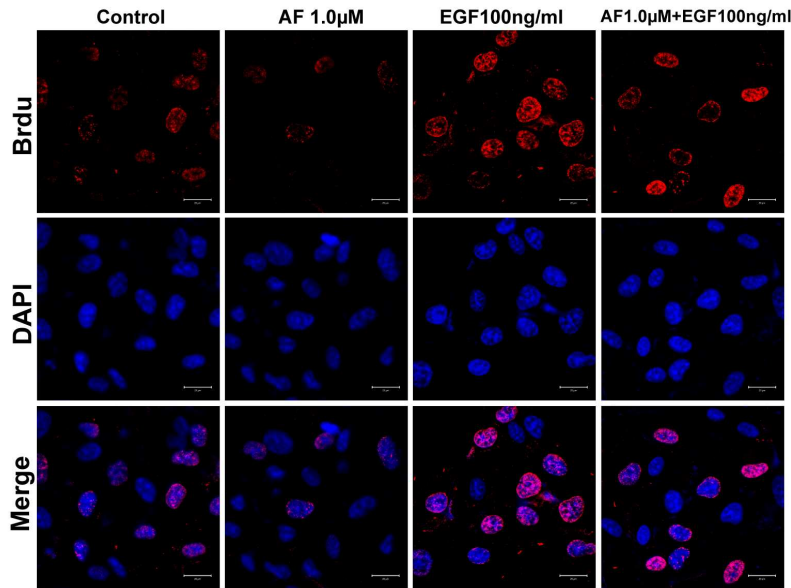

B

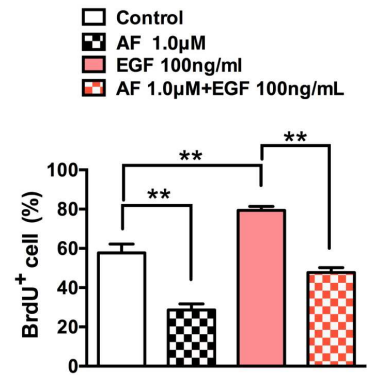

C

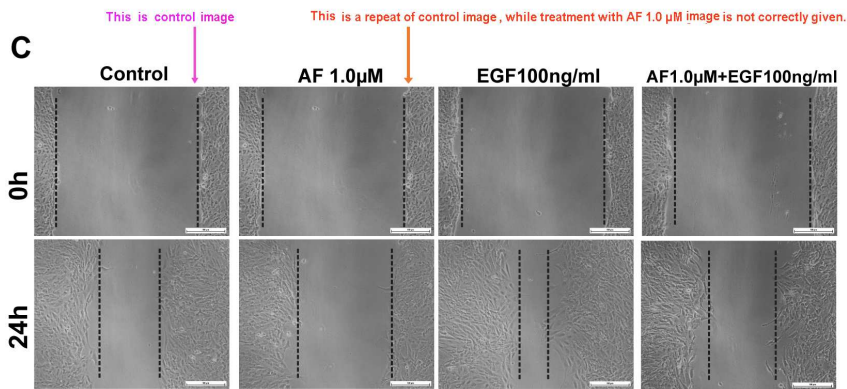

D

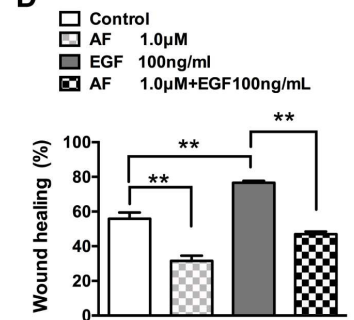

E

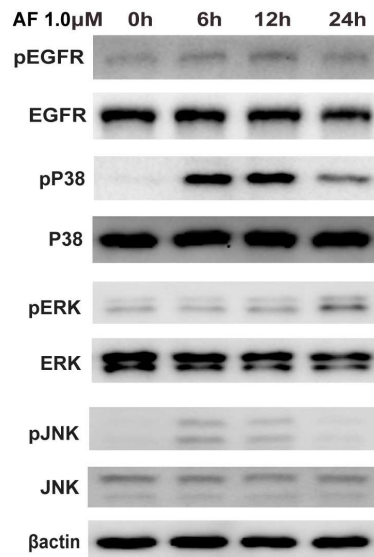

F

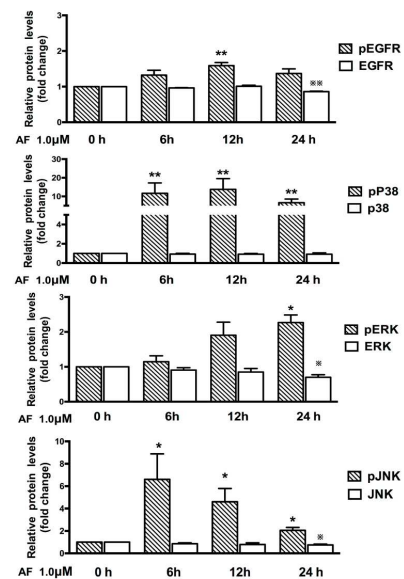

**Fig 5. Auranofin inhibits EGF-dependent proliferation and migration of ARPE-19 cells.** (A) Immunofluorescence microphotographs of proliferating ARPE-19 cell with BrdU (red) and DAPI (blue) staining after ARPE-19 cells were untreated or treated with AF (1.0  $\mu$ M) in the absence or presence of EGF (100ng/ml) for 24 hours and then subjected to BrdU labeling for 4 hours, followed by immunostaining with anti-BrdU antibody and DAPI. Scale bar = 20 $\mu$ m. (B) Quantitation data of the number of BrdU<sup>+</sup> cells shown in panel A. (C) ARPE-19 cells were subjected to wound healing assay, and then were left untreated or treated with AF (1.0  $\mu$ M) in the absence or presence of EGF (100 ng/ml) for 24 hours. Scale bar = 100 $\mu$ m. (D) Quantitation of the results shown in panel C. (E) ARPE-19 cells were treated with 1.0  $\mu$ M AF for 6, 12 and 24 hours. Cell lysates were subjected to Western blot for determination of total and phosphorylated EGFR, P38MAPK, ERK and JNK proteins.  $\beta$ -actin was used as a loading control. (F) Quantitative data of Western blot results shown in panel E from three experiments. The levels of the phosphorylated protein were compared with the control, \* P < 0.05, \*\* P < 0.01. The levels of the total protein were compared with the control, \*P < 0.05, \*\*P < 0.01. All data are mean  $\pm$  SEM.

doi:10.1371/journal.pone.0172599.g001

## Reference

1. Chen X, Tzekov R, Su M, Hong H, Min W, Han A, et al. (2016) Auranofin Inhibits Retinal Pigment Epithelium Cell Survival through Reactive Oxygen Species-Dependent Epidermal Growth Factor Receptor/Mitogen-Activated Protein Kinase Signaling Pathway. PLoS ONE 11(11): e0166386. doi:[10.1371/journal.pone.0166386](https://doi.org/10.1371/journal.pone.0166386) PMID: [27846303](https://pubmed.ncbi.nlm.nih.gov/27846303/)
